# Supplementary material
Source: publisher figshare collection journal article supplement (https://sage.figshare.com/ndownloader/files/21494853)
Supplement: Supplementary file 1 [file 21494853]

## Sheet: Online Appendix
	High-Income Countries (80) - more economically advanced countries					Middle-Income Countries (112) - less economically advanced countries					Low-Income Countries (31) - less economically advanced countries
	Andorra	Kuwait				Albania	Guatemala	Paraguay			Afghanistan
	Antigua and Barbuda	Latvia				Angola	Guyana	Peru			Benin
	Aruba	Liechtenstein				Algeria	Honduras	Phillipines			Burkina Faso
	Australia	Lithuania				American Samoa	India	Romania			Burundi
	Austria	Luxembourg				Argentina	Indonesia	Russian Federation			Central African Republic
	Bahamas, The	Macao SAR, China				Armenia	Iran, Islamic Rep.	Samoa			Chad
	Bahrain	Malta				Azerbaijan	Iraq	São Tomé and Principe			Congo, Dem. Rep
	Barbados	Monaco				Bangladesh	Jamaica	Senegal			Eritrea
	Belgium	Netherlands				Belarus	Jordan	Serbia			Ethiopia
	Bermuda	New Caledonia				Belize	Kazakhstan	Solomon Islands			Gambia, The
	British Virgin Islands	New Zealand				Bhutan	Kenya	Sri Lanka			Guinea
	Brunei Darussalam	Northern Mariana Islands				Bolivia	Kiribati	South Africa			Guinea-Bissau
	Canada	Norway				Bosnia and Herzegovina	Kosovo	St. Lucia			Haiti
	Cayman Islands	Oman				Botswana	Kyrgyz Republic	St. Vincent and the Grenadines			Korea, Dem. People's Rep.
	Channel Islands	Palau				Brazil	Lao PDR	Sudan			Liberia
	Chile	Panama				Bulgaria	Lebanon	Suriname			Madagascar
	Croatia	Poland				Cabo Verde	Lesotho	Swaziland			Malawi
	Curaçao	Portugal				Cambodia	Libya	Thailand			Mali
	Cyprus	Puerto Rico				Cameroon	Macedonia, FYR	Timor-Leste			Mozambique
	Czech Republic	Qatar				China	Malaysia	Tonga			Nepal
	Denmark	San Marino				Colombia	Maldives	Tunisia			Niger
	Estonia	Saudi Arabia				Comoros	Marshall Islands	Turkey			Rwanda
	Faroe Islands	Seychelles				Congo, Rep.	Mauritania	Turkmenistan			Sierra Leone
	Finland	Singapore				Costa Rica	Mauritius	Tuvalu			Somalia
	France	Sint Maarten (Dutch part)				Côte d'Ivoire	Mexico	Ukraine			South Sudan
	French Polynesia	Slovak Republic				Cuba	Micronesia, Fed. Sts.	Uzbekistan			Syrian Arab Republic
	Germany	Slovenia				Djibouti	Moldova	Vanuatu			Tajikistan
	Gibraltar	Spain				Dominica	Mongolia	Venezuela, RB			Tanzania
	Greece	St. Kitts and Nevis				Dominican Republic	Montenegro	Timor-Leste			Togo
	Greenland	St. Martin (French part)				Ecuador	Morocco	Tunisia			Uganda
	Guam	Sweden				Egypt, Arab Rep.	Myanmar	Ukraine			Yemen, Rep.
	Hong Kong SAR, China	Switzerland				El Salvador	Namibia	Uzbekistan
	Hungary	Taiwan, China				Equatorial Guinea	Nauru	Vanuatu
	Iceland	Trinidad and Tobago				Fiji	Nicaragua	Vietnam
	Ireland	Turks and Caicos Islands				Gabon	Nigeria	West Bank and Gaza
	Isle of Man	United Arab Emirates				Georgia	Pakistan	Zambia
	Israel	United Kingdom				Ghana	Papua New Guinea	Zimbabwe
	Italy	United States				Grenada
	Japan	Uruguay
	Korea, Rep.	Virgin Islands (U.S.)
						Taken from: https://datahelpdesk.worldbank.org/knowledgebase/articles/906519-world-bank-country-and-lending-groups
						Retrieved July 10, 2019
